# Supplementary material for: PRE loops constitute a topological chromatin structure that restricts and specifies enhancer promoter communication
Source: Research Square preprint supplement (doi:10.21203/rs.3.rs-3620990/v1), 2023-11-28
Supplement: Supplementary file 1 [file 2cad917c96758dbeab3d5f25.xlsx]

## Sheet: PRE deletions
Name of line	Position of deleted/masked sequence (dm6)	Deleted sequence	Inserted sequence
Double	2L : 16485929.. 16486572	tgtactgagagaaatgcgcgcgcaaaagttttattgcattaccttctcttgcgaatgacaaattcgtaatgaaaggcgag tttcaattcgattcctttcggattttcgtggcagcgacgccggcagcgcggtcggccgagacgagtgtgcttgtatgtgt gtgtctgtgcctgtgagagcgagctggtgtatctgtatctgcgattgtgcaaaaccagaatacgaatacgagtacgaata cgaatgtctgttgcccgtccacgtctcgcattacaccaataccaggccaaaaaggggagtggtatgtgcgattgatcggt gtgtttgcatctgtgtatatttctgtgtgcaaccccgaaaatacaatgacaaacgtaatcgctctctctctcttg…	none
	2L : 16422435..16423525	gtgtcagatcgcaaggcattggcttaaaaactgaacttaatccaaataaggtattagctcacatgcatttcagccgctcc tttcagaaggtttctgatcaaattgtaagaaaattcaaaaatttggaaaatgtctcctctggtttttccacatcttgctc tttctctctttgcttgattataatttgttttatttgttttgaacacgttttggggattgcttcaatgggaagaaaagagc gaggaagcgaggagcatggtggagaaacaggcgcgaaaaggggagcaaatggaagcagcgacgtcgacgtcggcggcgca gcaataactgtgcatttgtatttgtttgtcatttcgctctctcattgcgagaatgcgagtgtgtgtgcgtttccc…	none
ΔPRE1	2L : 16422435..16423525	gtgtcagatcgcaaggcattggcttaaaaactgaacttaatccaaataaggtattagctcacatgcatttcagccgctcc tttcagaaggtttctgatcaaattgtaagaaaattcaaaaatttggaaaatgtctcctctggtttttccacatcttgctc tttctctctttgcttgattataatttgttttatttgttttgaacacgttttggggattgcttcaatgggaagaaaagagc gaggaagcgaggagcatggtggagaaacaggcgcgaaaaggggagcaaatggaagcagcgacgtcgacgtcggcggcgca gcaataactgtgcatttgtatttgtttgtcatttcgctctctcattgcgagaatgcgagtgtgtgtgcgtttccc…	none
ΔPRE2	2L : 16485929.. 16486572	tgtactgagagaaatgcgcgcgcaaaagttttattgcattaccttctcttgcgaatgacaaattcgtaatgaaaggcgag tttcaattcgattcctttcggattttcgtggcagcgacgccggcagcgcggtcggccgagacgagtgtgcttgtatgtgt gtgtctgtgcctgtgagagcgagctggtgtatctgtatctgcgattgtgcaaaaccagaatacgaatacgagtacgaata cgaatgtctgttgcccgtccacgtctcgcattacaccaataccaggccaaaaaggggagtggtatgtgcgattgatcggt gtgtttgcatctgtgtatatttctgtgtgcaaccccgaaaatacaatgacaaacgtaatcgctctctctctcttg…	none

## Sheet: gypsy Insertion lines
Name of line	Position of deleted sequence (dm6)	Deleted sequence	Inserted sequence
gypsy 1	2L :16461008	none	CCTTATGCATGGAGGTCGACGATAAGCTTGAAGTTCCTATACTATTTGAAGAATAGGAACTTCGGAATAGGAACTTCAAG ATCCCCCTGGCGAAGGAATTCCTCGACGGTATCGATAAGCTTGATGATCCTCTAGTGGATCGATCCCCCAATTGATCGGC TAAATGGTATGGCAAGAAAAGGTATGCAATATAATAATCTTTTATTGGGTATGCAACGAAAATTTGTTTCGTCAACGTAT GCAATATTTTTTATTAAAAGAGGGTATGCAATGTATTTTATTAAAAACGGGTATGCAATATAATAATCTTTTATTGGGTA TGCAACGAAAATTTGTTTCGTCAAAGTATGCAATATTTTTTATTAAAAGAGGGTATGCAATGTATTTTATTAAAA…
gyspy 2	2L : 16466059	none	CCTTATGCATGGAGGTCGACGATAAGCTTGAAGTTCCTATACTATTTGAAGAATAGGAACTTCGGAATAGGAACTTCAAG ATCCCCCTGGCGAAGGAATTCCTCGACGGTATCGATAAGCTTGATGATCCTCTAGTGGATCGATCCCCCAATTGATCGGC TAAATGGTATGGCAAGAAAAGGTATGCAATATAATAATCTTTTATTGGGTATGCAACGAAAATTTGTTTCGTCAACGTAT GCAATATTTTTTATTAAAAGAGGGTATGCAATGTATTTTATTAAAAACGGGTATGCAATATAATAATCTTTTATTGGGTA TGCAACGAAAATTTGTTTCGTCAAAGTATGCAATATTTTTTATTAAAAGAGGGTATGCAATGTATTTTATTAAAA…
gypsy 3	2L : 16478142	none	CCTTATGCATGGAGGTCGACGATAAGCTTGAAGTTCCTATACTATTTGAAGAATAGGAACTTCGGAATAGGAACTTCAAG ATCCCCCTGGCGAAGGAATTCCTCGACGGTATCGATAAGCTTGATGATCCTCTAGTGGATCGATCCCCCAATTGATCGGC TAAATGGTATGGCAAGAAAAGGTATGCAATATAATAATCTTTTATTGGGTATGCAACGAAAATTTGTTTCGTCAACGTAT GCAATATTTTTTATTAAAAGAGGGTATGCAATGTATTTTATTAAAAACGGGTATGCAATATAATAATCTTTTATTGGGTA TGCAACGAAAATTTGTTTCGTCAAAGTATGCAATATTTTTTATTAAAAGAGGGTATGCAATGTATTTTATTAAAA…

## Sheet: deltaRE lines
Name of line	Position of deleted sequence (dm6)	Deleted sequence	Inserted sequence
ΔRE small	2L : 16464977..16466059	aaagggattagtaaattagattctgatagaggcaatcttgagtctaaaaagattctaagtaattaaattgaattgtatac attgcttaagataattgcgaaagttattgttaatgcttttataccttcgccttattagaagtggccttatgtgcgatttc tctcagcgttcccatgattaacccagttaaaactggtcgtaaagacgcccagccaataaatctgatttattgtcaaccag ttccagctaactgccgaaataacagttatatatggggcgaggacccttcaataaaacataaaatgaatgcatttaacgca aaatatgattgccacaatttagtggccaactgaaaaaggagcagcgtttcgaatgggaaacccacaatcagctaa…	none
ΔRE +gypsy	2L : 16464977..16466059	none	CCTTATGCATGGAGGTCGACGATAAGCTTGAAGTTCCTATACTATTTGAAGAATAGGAACTTCGGAATAGGAACTTCAAG ATCCCCCTGGCGAAGGAATTCCTCGACGGTATCGATAAGCTTGATGATCCTCTAGTGGATCGATCCCCCAATTGATCGGC TAAATGGTATGGCAAGAAAAGGTATGCAATATAATAATCTTTTATTGGGTATGCAACGAAAATTTGTTTCGTCAACGTAT GCAATATTTTTTATTAAAAGAGGGTATGCAATGTATTTTATTAAAAACGGGTATGCAATATAATAATCTTTTATTGGGTA TGCAACGAAAATTTGTTTCGTCAAAGTATGCAATATTTTTTATTAAAAGAGGGTATGCAATGTATTTTATTAAAA…

## Sheet: maked regions in 4C-seq
name	coordinates	type
attP11	chr2L:16,485,928-16,486,572	deletion
attP2	chr2L:16,422,435-16,423,525	deletion
dbPos	chr2L:16,485,928-16,486,572	deletion
	chr2L:16,422,435-16,423,525
db	chr2L:16,485,928-16,486,572	deletion
	chr2L:16,422,435-16,423,525
dach1	chr2L: 16,421,403-16,422,192	viewpoint
dach2	chr2L: 16,487,933-16,488,258	viewpoint
gypsy1	chr2L: 16,455,372-16,455,760	viewpoint
gypsy2	chr2L: 16,465,181-16,465,431	viewpoint
