# Supplementary material for: PRE loops constitute a topological chromatin structure that restricts and specifies enhancer promoter communication
Source: Research Square preprint supplement (doi:10.21203/rs.3.rs-3620990/v1), 2023-11-28
Supplement: Supplementary file 2 [file 30e4f2030e9045eb2e55cf7e.xlsx]

## Sheet: hiM barcodes
chrName	startSeq	endSeq	barcodeName	size
chr2L	16411158	16415678	barcode_27	4494
chr2L	16415731	16419417	barcode_28	3608
chr2L	16419474	16423341	barcode_29	3814
chr2L	16423392	16428271	barcode_30	4869
chr2L	16428379	16432648	barcode_31	4073
chr2L	16432692	16437141	barcode_33	4368
chr2L	16437205	16441659	barcode_34	4419
chr2L	16441736	16445620	barcode_35	3824
chr2L	16445697	16449123	barcode_37	3424
chr2L	16449194	16451783	barcode_38	2587
chr2L	16451827	16455171	barcode_40	3342
chr2L	16455215	16459249	barcode_41	4014
chr2L	16459317	16463368	barcode_42	4005
chr2L	16463412	16467432	barcode_43	4009
chr2L	16467476	16471511	barcode_44	4032
chr2L	16471555	16475435	barcode_45	3878
chr2L	16475493	16478699	barcode_46	3204
chr2L	16478743	16483356	barcode_47	4602
chr2L	16483458	16487761	barcode_48	4275
chr2L	16488064	16490760	barcode_49	2694
chr2L	16490804	16494764	barcode_50	3941
chr2L	16494808	16499053	barcode_51	4211
