# Supplementary material for: PRE loops constitute a topological chromatin structure that restricts and specifies enhancer promoter communication
Source: Research Square preprint supplement (doi:10.21203/rs.3.rs-3620990/v1), 2023-11-28
Supplement: Supplementary file 3 [file 624d6a8cfd0b7d9c2b5d32b0.xlsx]

## Sheet: gRNAs CRISPRCas9
gRNA	sequence (w/o PAM)	sequence (with PAM)	sense oligo for pCFD3	antisense oligo for pCFD3
PRE1_1	GCCTTGCGATCTGACACTTT	GCCTTGCG|ATCTGACACTTT GGG	GTCGCCTTGCGATCTGACACTTT	AAACAAAGTGTCAGATCGCAAGG
PRE1_2	GGGGCTTTCTGGGGTTAAGC	GGGGCTTT|CTGGGGTTAAGC TGG	GTCGGGGCTTTCTGGGGTTAAGC	AAACGCTTAACCCCAGAAAGCCC
PRE2_1	gcatttctctcagtacataa	GCATTTCT|CTCAGTACATAA CGG	GTCGcatttctctcagtacataa	AAACttatgtactgagagaaatg
PRE2_2	gcgctctcgctcgcccccat	GCGCTCTC|GCTCGCCCCCAT GGG	GTCGcgctctcgctcgcccccat	AAACatgggggcgagcgagagcg
gypsy1	GAGGAGGAGTAAGAATGCCA	GAGGAGGAGTAAGAATGCCAGGG	GTCGGAGGAGGAGTAAGAATGCCA	AAACTGGCATTCTTACTCCTCCTC
gypsy2	CACCAGGCAGACGCGCTCAT	CACCAGGCAGACGCGCTCATCGG	GTCGCACCAGGCAGACGCGCTCATCGG	AAACCCGATGAGCGCGTCTGCCTGGTG
gypsy3	AGATCCAAAGGGCAGGTCTC	AGATCCAAAGGGCAGGTCTCAGG	GTCGAGATCCAAAGGGCAGGTCTCAGG	AAACCCTGAGACCTGCCCTTTGGATCT
ΔRE	TGTGGAAGGTTCTTACGAAA	TGTGGAAGGTTCTTACGAAAGGG	GTCGTGTGGAAGGTTCTTACGAAA	AAACTTTCGTAAGAACCTTCCACA

## Sheet: pHD donor plasmid for CRISPR
Homology Arms	sequence	Size PCR fragment	Cloning startegy into pHD-dsRED
PRE1 left_SphI	GGTGgaattcttGCATGaggtgctcctggcttttgtcc	1552bp	GIBSON
PRE1 left_SacII	GGTGtgcatatgtccgcAGCTGGCCCCGACTCGAGTTA
PRE1 right_AscI	TTGGCGCGCCtttgggagaaatattaattgtacc	1543bp	Restriction enzyme digestions
PRE1 right_StuI	GAAGGCCTacgtgagtaggaggctgaaat
PRE2 left_SphI	GGTGgaattcttGCATGgtgaaggcaaagctgataatccg	1534bp	GIBSON
PRE2 left_SacII	GGTGtgcatatgtccgccatgggcgacgccttatataaac
PRE2 right_AscI	gatctccatgcataaggtaacggtagcgcttcgtgtgtac	1575bp	GIBSON
PRE2 right_StuI	cctcgagctgcagaaggggatggcgacttggtgaactgg
gypsy1 left_SacII	TCCGCGGCCGCTAGCATGccagggaaacgtgcacaag	1495bp	GIBSON
gypsy1 left_SphI	GGTGgaattcttGCATGgcaggtggttaaattgggaac
gypsy1_right_AscI	gatctccatgcataaggcattcttactcctcctctg	1366bp	GIBSON
gypsy1_right_StuI	cctcgagctgcagaaggcatggtcatgtcactcactcag
gypsy2 left_SacII	GGTGtgcatatgtccgcagcgcgtctgcctggtgcta	1370bp	GIBSON
gypsy2 left_SphI	GGTGgaattcttGCATGgatgcagaacttccgatatccc
gypsy2_right_AscI	gatctccatgcataaggcatcggaggagcgtgagatag	1400bp	GIBSON
gypsy2_right_StuI	cctcgagctgcagaaggtggcggcttatttgtgtgtgg
gypsy3 left_SacII	tatgtccgcggccgctagaactggggctaagctgcaaattg	1400bp	GIBSON
gypsy3 left_SphI	GGTGgaattcttGCATGcatacgggccatttgcattttgc
gypsy3_right_AscI	ataaggcgcgcctaggtctggacgccagatcgccaaaac	1400bp	GIBSON
gypsy3_right_StuI	ctcgagctgcagaagggccatgcatactccatacacatac
ΔRE left_SacII	GGTGtgcatatgtccgcagcgcgtctgcctggtgcta	1370bp	GIBSON
ΔRE left_SphI	GGTGgaattcttGCATGgatgcagaacttccgatatccc
ΔRE_right_AscI	gatctccatgcataaggcgtaagaaccttccgcatgac	1400bp	GIBSON
ΔRE_right_StuI	cctcgagctgcagaaggctgctcgacacacacaaacag
gypsy Insulator	sequence
gypsy_rev	gcgcgccttatgcatggaggtcgacgataagcttgaag	Bgl II site, gypsy sequence amplified fromplasmid (Gy)w(Gy) described in (Silicheva et al., 2010) and first cloned into phd-dsRED plasmid, then homolohy ars cloned using gibson kit
gypsy_fw	cgaagttataGAAGAGCaAACAAAAGCTGGAGCTCCAC	Spe site

## Sheet: Primers for RNA FISH
Targeted RNA	Primer forward	Primer reverse
dachshund	ctcgctatcgcatctaagcac	gctcttgagtgggtgatgaag
CG5888	gcgcaattagggacagcaaa	tcaggatgtggtggctacttc

## Sheet: Primers for RT-qPCR
Targeted RNA	Primer forward	Primer reverse
dachshund	ctcgctatcgcatctaagcac	gctcttgagtgggtgatgaag
CG5888	gcgcaattagggacagcaaa	tcaggatgtggtggctacttc
RP49	gcccaagggtatcgacaaca	gcgcttgttcgatccgtaac

## Sheet: Primers for qPCR
	Oligoname	sequence
D1	CG5888_RT-S1	gttctcgcacttgatctcctg
	CG5888_RT-AS1	tcaggatgtggtggctacttc
D2	DAC PRE1_S5	ccagcgactagctcttgacag
	DAC PRE1_AS5	catttcagcctcctactcacg
PRE 3'end	dac_PRE1_S2	cgctatgtactggcttcctttc
	dac_PRE1_AS2	aaccaaacacacaagacagtcg
D3	Dac domain_S1	tcaatcggttttccaactgac
	Dac domain_AS1	tcgatttgcgactaaatgagg
D4	DAC_RT-S1	ctcgctatcgcatctaagcac
	DAC_RT-AS1	gctcttgagtgggtgatgaag
D5	dac S1	ctaaccgaaagctgcgtaattc
	dac AS1	actagctcctagatccccctca
D6	dacP_AS1	CATCACTGACACAAGACACTCG
	dacP_S1	GAACTCGATTAACACAAGCGGG
PRE TSS	dac_PRE2_S1	tctcgcattacaccaataccag
	dac_PRE2_AS1	gggaggatttgaagaacacaac
D7	Dac domain_S4	gctatctctttccgtcccaag
	Dac domain_AS4	aagaaagatgccctgccatag
D8	Dac domain_S5	ctgcgattcttctccataacg
	Dac domain_AS5	gggtgaggaaatccacaaaag

## Sheet: 4C viewpoints
Viewpoint	Primer forward	Primer reverse
PRE2	gcggccagttccaatacaag	atctttgcgcttgcttgtgg
ΔRE	gacctgcccacctaatgctc	tcagatttattggctgggcgt
upstream ΔRE	accaggccattccgattgag	atcgctggctaacaaaccca
Viewpoint	Primer forward	Primer reverse	Comment
PRE1	dach1_5prime_F	CCGCCATTTTTGGACTGTTGA	Reading primer on top of DpnII	Dpn II frag 1,1kb	approx 240 bp from deletion
	dach1_5prime_R	GGCGTAAGGACCTTTAGGC	Non reading primer 29 bp from NlaIII	DpnII NlaIII frag 820bp
PRE2	dach2_3prime_F	GCGGCCAGTTCCAATACAAG	Non reading primer 22 bp from NlaIII	DpnII NlaIII frag 385 bp	approx 1,3kb from deletion
	dach2_3prime_R	ATCTTTGCGCTTGCTTGTGG	Reading primer 31 bp from DpnII	Dpn II frag 492bp
upstream ΔRE	gypsy_5prime_F	ACCAGGCCATTCCGATTGAG	Reading primer 32 bp from DpnII	DpnII frag 770 bp	approx 5kb from Insulator
	gypsy_5prime_R	ATCGCTGGCTAACAAACCCA	Non reading primer 17 bp from NlaIII	DpnII NlaIII frag 400bp
ΔRE	gypsy_3prime_F	GACCTGCCCACCTAATGCTC	Reading primer 2bp from dpnII	Dpn II frag 496 bp	approx 4kb from Insulator
	gypsy_3prime_R	TCAGATTTATTGGCTGGGCGT	Non reading primer 27bp from NlaIII	DpnII NlaIII frag 286bp
