# Supplementary material for: PRE loops constitute a topological chromatin structure that restricts and specifies enhancer promoter communication
Source: Research Square preprint supplement (doi:10.21203/rs.3.rs-3620990/v1), 2023-11-28
Supplement: Supplementary file 4 [file 67379df9a1cebfb53502bc2d.xlsx]

## Sheet: Sheet1
Genotype	Viewpoint	Replicate	Tissue	# reads
Gypsy1	PRE2	rep1	larva	3936248
Gypsy1	PRE2	rep2	larva	4460335
Gypsy1	PRE2	rep3	larva	4693743
Gypsy2	PRE2	rep1	larva	3151718
Gypsy2	PRE2	rep2	larva	2297342
Gypsy2	PRE2	rep3	larva	2401988
WT	PRE2	rep1	larva	8159235
WT	PRE2	rep2	larva	15346046
WT	PRE2	rep3	larva	14389132
WT	PRE2	rep4	larva	2274115
WT	PRE2	rep5	larva	2285970
WT	PRE2	rep6	larva	2450581
Gypsy1	RE	rep1	larva	4810730
Gypsy1	RE	rep2	larva	4104820
Gypsy1	RE	rep3	larva	4546853
Gypsy2	RE	rep1	larva	5279400
Gypsy2	RE	rep2	larva	6456560
Gypsy2	RE	rep3	larva	4381703
WT	RE	rep1	larva	16601505
WT	RE	rep2	larva	10088097
WT	RE	rep3	larva	9895532
WT	RE	rep4	larva	3997998
WT	RE	rep5	larva	4561465
WT	RE	rep6	larva	4811772
Gypsy1	PRE2	rep1	embryo	944952
Gypsy1	PRE2	rep3	embryo	1466765
Gypsy1	PRE2	rep4	embryo	1383955
Gypsy2	PRE2	rep1	embryo	22267544
Gypsy2	PRE2	rep3	embryo	21044416
Gypsy2	PRE2	rep4	embryo	19952708
WT	PRE2	rep1	embryo	800269
WT	PRE2	rep3	embryo	1320945
WT	PRE2	rep4	embryo	1148485
WT	PRE2	rep5	embryo	14352639
WT	PRE2	rep6	embryo	15604850
WT	PRE2	rep7	embryo	20146926
Gypsy1	RE	rep1	embryo	1275993
Gypsy1	RE	rep3	embryo	1276264
Gypsy1	RE	rep4	embryo	1394565
Gypsy2	RE	rep1	embryo	25904672
Gypsy2	RE	rep3	embryo	24515163
Gypsy2	RE	rep4	embryo	21961921
WT	RE	rep1	embryo	1461167
WT	RE	rep3	embryo	1443941
WT	RE	rep4	embryo	899390
WT	RE	rep5	embryo	19805091
WT	RE	rep6	embryo	19892140
WT	RE	rep7	embryo	24823064
Gypsy2	PRE2	rep1	pupa	16638131
Gypsy2	PRE2	rep2	pupa	14524282
Gypsy2	PRE2	rep3	pupa	10616943
WT	PRE2	rep1	pupa	9607484
WT	PRE2	rep2	pupa	9531010
WT	PRE2	rep3	pupa	13791311
Gypsy2	RE	rep1	pupa	10053003
Gypsy2	RE	rep2	pupa	12648227
Gypsy2	RE	rep3	pupa	15266101
WT	RE	rep1	pupa	16151108
WT	RE	rep2	pupa	18297507
WT	RE	rep3	pupa	13288225
