# Supplementary material for: PRE loops constitute a topological chromatin structure that restricts and specifies enhancer promoter communication
Source: Research Square preprint supplement (doi:10.21203/rs.3.rs-3620990/v1), 2023-11-28
Supplement: Supplementary file 5 [file d8208cf4f111bc7b2c9ac484.xlsx]

## Sheet: Sheet1
	Sample	fastq file	Read-pairs	Vaild-interactions	Valid-interactions chr2L (chr2L:0-23,513,712bp)	Valid-interactions dac region (chr2L:10-20Mbp)
	hic_LD_DRE_Rep1_dm6_BeS	210102_I53_V300089258_L1_deltaRE1_1.fq, 210102_I53_V300089258_L1_deltaRE1_2.fq	336759648	11069997	1810565	671097
	hic_LD_gypsy1_Rep2_dm6_BeS	V300079301_L03_read_1.fq, V300079301_L03_read_2.fq	406347004	33213917	5471762	2050334
	hic_LD_gypsy1_Rep3_dm6_BeS	V300079301_L04_read_1.fq, V300079301_L04_read_2.fq	400676791	35601027	6172201	2311549
	hic_LD_gypsy2Enh_Rep1_dm6_BeS	V300079471_L01_read_1.fq, V300079471_L01_read_2.fq	464598189	41625728	7115819	2670618
	hic_LD_gypsy1_Rep1_dm6_BeS	V300079301_L02_read_1.fq, V300079301_L02_read_2.fq	397615714	44084575	7526600	2856082
	hic_LD_DRE_Rep2_dm6_BeS	210102_I53_V300089258_L4_deltaRE2_1.fq, 210102_I53_V300089258_L4_deltaRE2_2.fq	179350609	46105313	7703244	2841518
	hic_LD_gypsy2Enh_Rep2_dm6_BeS	V300079471_L02_read_1.fq, V300079471_L02_read_2.fq	464965791	59796946	10052086	3864984
	hic_LE_WT_Rep1_dm6_YO	NA	NA	63436125	9791808	3650633
	hic_LD_gypsy3_Rep2res_dm6_SD	gypsy3_2_L1_1.fq_reads1.gz, gypsy3_2_L1_2.fq_reads2.gz	427011808	71460310	12005570	4422594
	hic_LD_gypsy2Enh_Rep3_dm6_BeS	V300079471_L04_read_1.fq, V300079471_L04_read_2.fq	460278520	72719490	12275871	4670061
	hic_larvae_DWT_Rep1_dm6_BeS	V300079466_L03_read_1.fq, V300079466_L03_read_2.fq	406977606	74401888	12323236	4599879
	hic_LD_gypsy3_Rep1res_dm6_SD	gypsy3_1_L1_1.fq_reads1.gz, gypsy3_1_L1_2.fq_reads2.gz	420631894	75621880	12627719	4619530
	hic_LD_gypsy3_Rep2_dm6_SD	gypsy3_2_L1_1.fq_reads1.gz, gypsy3_2_L1_2.fq_reads2.gz	475396589	78566207	13121875	4810525
	hic_larvae_DWT_Rep3_dm6_BeS	V300079301_L01_read_1.fq, V300079301_L01_read_2.fq,	400021178	79178558	13398703	5022876
	hic_pupae_DWT_Rep3_dm6_BeS	210102_I53_V300089258_L4_pupedeltaWT3_1.fq, 210102_I53_V300089258_L4_pupedeltaWT3_2.fq	209214405	79262738	12899410	4656487
	hic_LD_gypsy3_Rep1_dm6_SD	gypsy3_1_L1_1.fq_reads1.gz, gypsy3_1_L1_2.fq_reads2.gz	478438289	87072659	14469844	5262009
	hic_pupae_DWT_Rep1_dm6_BeS	210103_I104_V300090746_L2_pupedeltaWT1_1.fq, 210103_I104_V300090746_L2_pupedeltaWT1_2.fq	235135010	89963211	14639529	5288845
	hic_larvae_DWT_Rep2_dm6_BeS	V300079466_L04_read_1.fq, V300079466_L04_read_2.fq	387902599	92833920	16158585	6062303
	hic_LE_WT_Rep2_dm6_YO	NA	NA	99987446	15828233	6001523
	hic_pupae_DWT_Rep2_dm6_BeS	210103_I104_V300090746_L3_pupedeltaWT2_1.fq, 210103_I104_V300090746_L3_pupedeltaWT2_2.fq	320312823	106904886	18025390	6563906
	hic_LE_WT_Rep3_dm6_VL	NA	NA	161096831	27247303	10614884
